# Supplementary material
Source: publisher figshare collection journal article supplement (https://tandf.figshare.com/ndownloader/files/21947559)
Supplement: Supplementary file 1 [file 21947559]

| **Coast** | **Estuary code** | **Estuary name** | **Shore Disance (m)** | **Max window (m)** |
| --- | --- | --- | --- | --- |
| ATL | ALBE | Albemarle Sound | 11430 | 16165 |
| ATL | ALTA | Altahama Sound | 1218 | 1723 |
| ATL | ANNI | Annisquam River/Blynman Canal | 319 | 451 |
| ATL | ARTH | Arthur Kill | 484 | 684 |
| ATL | ASSA | Assawoman Bay | 1490 | 2108 |
| ATL | BARN | Barnegat Bay | 2567 | 3630 |
| ATL | BARS | Barnstable Harbor | 722 | 1022 |
| ATL | BISC | Biscayne Bay | 7356 | 10403 |
| ATL | BLUE | Blue Hill Bay | 2975 | 4207 |
| ATL | BOGU | Bogue Sound/Core Sound | 3048 | 4310 |
| ATL | BOST | Boston Harbor | 2137 | 3022 |
| ATL | BRAV | Brave Boat Harbor | 170 | 240 |
| ATL | BROA | Broad River/Port Royal Sound | 2555 | 3613 |
| ATL | BROD | Broad Sound | 1782 | 2520 |
| ATL | BULL | Bulls Bay | 2063 | 2918 |
| ATL | BUSH | Bush River | 1034 | 1463 |
| ATL | BUZZ | Buzzards Bay | 6991 | 9887 |
| ATL | CALI | New River/Calibogue Sound | 2131 | 3013 |
| ATL | CAPE | Cape Fear River | 1177 | 1664 |
| ATL | CAPR | Capers Creek | 457 | 646 |
| ATL | CARR | Cape Romaine Refuge | 1248 | 1765 |
| ATL | CASC | Casco Bay | 4158 | 5881 |
| ATL | CBMN | Chesapeake Bay Mainstem | 17326 | 24503 |
| ATL | CHAR | Charlestown Harbor/Folly River | 1961 | 2774 |
| ATL | CHAT | Pleasant Bay/Chatham Harbor | 900 | 1273 |
| ATL | CHES | Chester River | 2337 | 3305 |
| ATL | CHIN | Chincoteague Bay | 3095 | 4377 |
| ATL | CHOP | Choptank River | 2496 | 3529 |
| ATL | COBS | Cobscook | 1501 | 2123 |
| ATL | CUMB | Cumberland Sound/Saint Mary's River | 1125 | 1590 |
| ATL | CURR | Currituck Sound | 3278 | 4635 |
| ATL | DAMA | Damariscaotta | 918 | 1299 |
| ATL | DEBO | Deboy Sound | 845 | 1195 |
| ATL | DELA | Delaware Bay | 16264 | 23001 |
| ATL | DEWE | Dewes/Hamlin Creek | 999 | 1413 |
| ATL | DUXB | Duxbury Bay/Plymouth Harbor | 2226 | 3149 |
| ATL | EAST | Eastern Bay | 3263 | 4615 |
| ATL | ELKR | Elk River | 1159 | 1639 |
| ATL | ESSE | Essex Bay | 755 | 1068 |
| ATL | FLEE | Great Wilmico/Fleets Bay | 1299 | 1837 |
| ATL | FREN | Frenchman's Bay | 3004 | 4248 |
| ATL | GARD | Gardiner Bay/Peconic Bay | 5728 | 8101 |
| ATL | GBAY | Great Bay | 1315 | 1860 |
| ATL | GLOU | Glouchester Harbor | 875 | 1237 |
| ATL | GOOS | Goosefare Bay | 474 | 671 |
| ATL | GOUL | Gouldsboro Bay | 1179 | 1667 |
| ATL | GREA | Great Bay | 2560 | 3620 |
| ATL | GSBY | Great South Bay | 3403 | 4813 |
| ATL | GUNP | Gunpowder River | 1550 | 2192 |
| ATL | HAMP | Hampton Harbor | 450 | 636 |
| ATL | HAYC | Haycock Harbor/Baileys Mistake | 503 | 711 |
| ATL | HONG | Honga River | 1890 | 2673 |
| ATL | HUDS | Hudson River | 2406 | 3403 |
| ATL | INDR | Indian River Bay | 3770 | 5332 |
| ATL | JAMA | Jamaica Bay | 1047 | 1480 |
| ATL | JAME | James River | 4146 | 5863 |
| ATL | JEKY | Jekyll Sound/Saint Andrews Sound | 2343 | 3314 |
| ATL | KATA | Katama Bay | 781 | 1104 |
| ATL | KENN | Kennebec River Estuary | 1173 | 1660 |
| ATL | LITT | Little River | 437 | 618 |
| ATL | LKEN | Little Kennebec/Englishman Bay/Chandler Bay | 1890 | 2673 |
| ATL | LNAR | Little Narragansett Bay | 2271 | 3212 |
| ATL | LOCK | Lockwoods Folly River | 474 | 671 |
| ATL | LONG | Long Island Sound | 15452 | 21853 |
| ATL | LOXA | Loxahatchee River | 547 | 774 |
| ATL | LWOR | Lake Worth | 323 | 457 |
| ATL | LYNN | Lynnhaven River | 680 | 962 |
| ATL | MACH | Machias Bay | 2064 | 2919 |
| ATL | MADD | Maddaket Harbor | 1120 | 1584 |
| ATL | MAGO | Magothy River | 1321 | 1869 |
| ATL | MANA | Manasquan River | 402 | 569 |
| ATL | MERR | Merrimack River | 934 | 1321 |
| ATL | MIDD | Middle and Back Rivers | 883 | 1249 |
| ATL | MOJA | Mojack Bay | 3715 | 5253 |
| ATL | MOOS | Moose Cove | 470 | 664 |
| ATL | MURR | Murrells Inlet | 212 | 300 |
| ATL | MUSC | Muscongus Bay | 2619 | 3704 |
| ATL | NANT | Nantucket Harbor | 1209 | 1710 |
| ATL | NARR | Narragansett Bay | 2670 | 3776 |
| ATL | NARS | Narraguagas Bay | 1413 | 1998 |
| ATL | NASS | Nassau Sound | 859 | 1215 |
| ATL | NAVE | Navesink River | 582 | 824 |
| ATL | NCIW | NC Intracoastal Waterway | 691 | 977 |
| ATL | NEDI | North Edisto River | 878 | 1242 |
| ATL | NERI | Northeast River | 1579 | 2233 |
| ATL | NEWB | Newark Bay/Kill Van Kull | 949 | 1342 |
| ATL | NEWR | New River | 1740 | 2461 |
| ATL | NJCB | NJ Coastal Bays/Great Egg Harbor | 1034 | 1463 |
| ATL | NOSO | North/South Rivers | 283 | 400 |
| ATL | NSAN | North & South Santee Rivers | 684 | 967 |
| ATL | NYHA | New York Harbor | 5920 | 8373 |
| ATL | OSSA | Ossabaw Sound | 1323 | 1871 |
| ATL | OTTE | Otter Cove | 247 | 350 |
| ATL | PAML | Pamlico Sound | 17273 | 24428 |
| ATL | PASS | Passamaquoddy Bay/St. Croix River | 1008 | 1426 |
| ATL | PATA | Patapsco River | 2220 | 3140 |
| ATL | PATU | Patuxent River | 1617 | 2287 |
| ATL | PENO | Penobscot Bay | 4625 | 6540 |
| ATL | PIAN | Piankatank River | 1734 | 2452 |
| ATL | PLBY | Pleasant Bay | 1437 | 2032 |
| ATL | PLUM | Plum Island Sound | 577 | 816 |
| ATL | PONC | Ponce de Leon Inlet | 1974 | 2791 |
| ATL | POQU | Poquoson/Back Rivers | 947 | 1340 |
| ATL | POTO | Potomac River | 5636 | 7970 |
| ATL | PROS | Prospect Harbor | 872 | 1233 |
| ATL | QUOD | Quoddy Narrows | 907 | 1283 |
| ATL | RAPP | Rappahannock River | 2682 | 3793 |
| ATL | RARI | Raritan Bay | 3019 | 4269 |
| ATL | REED | Lakes/Reeds Bay | 1006 | 1423 |
| ATL | REHO | Rehoboth Bay | 2322 | 3284 |
| ATL | SACO | Saco Bay | 2481 | 3509 |
| ATL | SALE | Salem Sound | 1524 | 2155 |
| ATL | SAPE | Sapelo Sound | 1519 | 2148 |
| ATL | SASS | Sassafrass River | 1213 | 1716 |
| ATL | SAVA | Savannah River | 424 | 600 |
| ATL | SCCP | Southern Cape Coastal Ponds | 859 | 1215 |
| ATL | SEDI | South Edisto River | 738 | 1044 |
| ATL | SENG | Sengekontacket Pond | 351 | 497 |
| ATL | SEVE | Severn River | 966 | 1366 |
| ATL | SEWE | Sewee Bay | 696 | 984 |
| ATL | SHAL | Shallotte River | 285 | 402 |
| ATL | SHAR | Shark River | 450 | 636 |
| ATL | SHEE | Sheepscot Bay | 3394 | 4800 |
| ATL | SHIN | Shinnecock Bay | 1745 | 2468 |
| ATL | SHRE | Shrewsbury River | 618 | 875 |
| ATL | SOME | Somes Sound/SW Bay | 1168 | 1652 |
| ATL | SOUT | South River | 1036 | 1465 |
| ATL | SRCP | Southern Coastal Ponds | 679 | 960 |
| ATL | STAU | Saint Augustine | 618 | 874 |
| ATL | STCA | Saint Catherines Sound | 1440 | 2037 |
| ATL | STHE | Saint Helena Sound | 2151 | 3042 |
| ATL | STJR | Saint Johns River | 2383 | 3370 |
| ATL | STON | Stono River | 566 | 800 |
| ATL | STSI | St Simons Sound | 1248 | 1765 |
| ATL | SUSQ | Susquehanna River | 4155 | 5877 |
| ATL | TANG | Tangier & Pocomoke Sounds | 6951 | 9831 |
| ATL | TENA | Long Cove/Tenants Harbor | 408 | 577 |
| ATL | TYBE | Tybee Creek | 270 | 382 |
| ATL | VACB | VA Coastal Bays | 1155 | 1633 |
| ATL | WASS | Wassaw Sound | 2139 | 3025 |
| ATL | WELL | Wells | 2451 | 3467 |
| ATL | WESB | Western Bay | 1816 | 2568 |
| ATL | WEST | West River | 811 | 1146 |
| ATL | WINY | Winyah Bay | 1136 | 1606 |
| ATL | YORH | York Harbor | 350 | 495 |
| ATL | YORK | York River | 1864 | 2636 |
| GOM | ALLI | Alligator Cove | 342 | 484 |
| GOM | APCA | Apalachicola Bay | 6032 | 8530 |
| GOM | APCE | Apalachee Bay | 9969 | 14098 |
| GOM | ARAN | Aransas Bay | 5052 | 7144 |
| GOM | ATCH | Atchafalaya Bay/Vermillion Bay | 9689 | 13702 |
| GOM | BAFF | Baffin Bay | 3644 | 5153 |
| GOM | BARA | Barataria Bay | 5516 | 7801 |
| GOM | BAYJ | Bay Junop/Caillou Lake/Lake Mechant | 4968 | 7026 |
| GOM | BCOQ | Sandy Point Bay/Bay Coquette | 1027 | 1452 |
| GOM | BLAC | Blackwater Sound | 592 | 837 |
| GOM | BLAF | Bayou Lafourche | 182 | 258 |
| GOM | BOGB | Boggy Bay | 335 | 474 |
| GOM | BOGG | Boggy Creek | 90 | 127 |
| GOM | BRAZ | Brazos River | 819 | 1158 |
| GOM | BRET | Breton/Chandeleur Sound | 15278 | 21606 |
| GOM | BROR | Broad River/Rodgers River | 240 | 339 |
| GOM | BSPR | Big Spring Creek | 108 | 153 |
| GOM | BUCK | Buck Creek | 60 | 85 |
| GOM | BUMB | Bumblebee Creek | 170 | 240 |
| GOM | CALA | Calacasieu Lake | 4875 | 6894 |
| GOM | CHAH | Charlotte Harbor | 5134 | 7260 |
| GOM | CHOC | Choctawhatchee Bay | 4276 | 6047 |
| GOM | CLAY | Clay Creek | 60 | 85 |
| GOM | CLEA | Clearwater/ST JOSEPH SOUND | 2751 | 3891 |
| GOM | COCO | Cocohatchee River | 210 | 297 |
| GOM | CORP | Corpus Christi Bay | 6176 | 8734 |
| GOM | CROO | Crooked Creek | 42 | 60 |
| GOM | CRYS | Crystal River area | 3216 | 4548 |
| GOM | DALL | Dallus Creek | 153 | 216 |
| GOM | DAYS | Days Creek | 67 | 95 |
| GOM | DEAD | Deadman Bay | 1440 | 2036 |
| GOM | EAGL | Eaglenest Creek | 85 | 120 |
| GOM | ELEV | Eleven Prong Bay | 201 | 285 |
| GOM | ESTE | Estero Bay | 1001 | 1416 |
| GOM | FILL | Fillman Bayou | 350 | 495 |
| GOM | FIRS | First Bay & associated Bays | 778 | 1101 |
| GOM | FISH | Fish Creek | 60 | 85 |
| GOM | FLOR | Florida Bay | 17612 | 24906 |
| GOM | GALV | Galveston Bay | 8764 | 12394 |
| GOM | HORS | Horseshoe Cove | 1273 | 1801 |
| GOM | ICW4 | Icw #4 | 150 | 212 |
| GOM | ICWM | Icw (Wolf-Mobile) | 108 | 153 |
| GOM | INDB | Indian Bay | 510 | 721 |
| GOM | JOHN | Johnson Creek | 120 | 170 |
| GOM | LAGU | Upper Laguna Madre | 7138 | 10094 |
| GOM | LBOR | Lake Borgne | 8464 | 11970 |
| GOM | LLAG | Little Lagoon | 552 | 780 |
| GOM | LOWS | Lows Bay | 899 | 1271 |
| GOM | LPIN | Little Pine 1 Bay | 513 | 725 |
| GOM | LPON | Lake Pontchartrain | 18646 | 26369 |
| GOM | LROC | Little Rocky Creek | 90 | 127 |
| GOM | LSPR | Little Spring Creek | 42 | 60 |
| GOM | MERM | Mermentau River | 3948 | 5584 |
| GOM | MOBI | Mobile Bay | 11281 | 15954 |
| GOM | MORD | Matagorda Bay | 10155 | 14361 |
| GOM | MSBF | Mississippi Bird's foot | 3408 | 4819 |
| GOM | MSND | Mississippi Sound | 10811 | 15289 |
| GOM | NAPL | Naples Bay | 277 | 391 |
| GOM | OUTD | Outer Doctors Bay | 150 | 212 |
| GOM | OYSR | Oyster Creek | 90 | 127 |
| GOM | OYST | Oyster Creek | 60 | 85 |
| GOM | PENS | Pensacola Bay/Santa Rosa Sound | 4902 | 6933 |
| GOM | PERD | Perdido Bay | 2310 | 3267 |
| GOM | PITH | Pithlachascotee River | 240 | 339 |
| GOM | ROC1 | Rock 1 Bay | 495 | 700 |
| GOM | SABI | Sabine Lake | 5210 | 7368 |
| GOM | SAL2 | Salt Creek | 60 | 85 |
| GOM | SALT | Salt Creek | 60 | 85 |
| GOM | SANA | San Antonio Bay | 7168 | 10137 |
| GOM | SANC | Sanders Creek | 85 | 120 |
| GOM | SARA | Sarasota Bay | 2572 | 3637 |
| GOM | SINK | Sink Creek | 134 | 190 |
| GOM | SJB2 | Saint Joseph Bay | 4930 | 6973 |
| GOM | SPRW | Spring Warrior Creek | 67 | 95 |
| GOM | STAN | Saint Andrew Bay | 2455 | 3472 |
| GOM | STOR | Storter Bay | 780 | 1103 |
| GOM | SUWA | Suwanee River | 285 | 402 |
| GOM | TAMP | Tampa Bay | 6871 | 9716 |
| GOM | TENT | Ten Thousand Islands/Marco Bay | 2340 | 3309 |
| GOM | TERR | Terrebonne Bay/Timbalier Bay | 5652 | 7993 |
| GOM | WACC | Waccasassa River | 2310 | 3267 |
| GOM | WEEK | Weeki Wachee Bay | 677 | 957 |
| GOM | WHAC | Whackup Creek | 67 | 95 |
| GOM | WHIT | Whitewater Bay | 1465 | 2072 |
| GOM | WITB | Withlacoochee Bay | 1065 | 1507 |
| GOM | YATE | Yates Creek | 42 | 60 |
| PAC | AHED | Agua Hedionda Creek | 297 | 420 |
| PAC | ALBI | Albion River | 248 | 351 |
| PAC | ALSE | Alsea Bay | 1050 | 1485 |
| PAC | ARRB | Arroyo Burro | 15 | 21 |
| PAC | ARRC | Arroyo de la Cruz | 15 | 21 |
| PAC | ARRG | Arroyo Grande Creek | 15 | 21 |
| PAC | ATAS | Atascadero Creek | 15 | 21 |
| PAC | BATI | Batiquitos Lagoon | 354 | 501 |
| PAC | BEAR | Bear River | 21 | 30 |
| PAC | BEAV | Beaver Creek | 15 | 21 |
| PAC | BELL | Bellingham Bay | 4607 | 6516 |
| PAC | BERR | Berry Creek | 15 | 21 |
| PAC | BIGC | Big Creek | 15 | 21 |
| PAC | BIGL | Big Lagoon | 1173 | 1660 |
| PAC | BIGR | Big River | 117 | 166 |
| PAC | BIRC | Birch Bay | 1935 | 2737 |
| PAC | BOBC | Bob Creek | 15 | 21 |
| PAC | BODE | Bodega Bay | 2094 | 2962 |
| PAC | BOON | Boone Creek | 15 | 21 |
| PAC | BSUR | Big Sur River | 21 | 30 |
| PAC | CANG | Canada de la Gaviota | 15 | 21 |
| PAC | CANH | Canada Honda Creek | 15 | 21 |
| PAC | CANR | Canada Del Refugio | 15 | 21 |
| PAC | CAPC | Cape Creek | 15 | 21 |
| PAC | CARM | Carmel | 1681 | 2378 |
| PAC | CARP | Carpinteria Creek | 15 | 21 |
| PAC | CAYU | Cayucos Creek | 15 | 21 |
| PAC | CHAN | Channel Islands Harbor | 210 | 297 |
| PAC | CHET | Chetco River | 108 | 153 |
| PAC | CHIA | China Creek | 15 | 21 |
| PAC | COLU | Columbia River | 4815 | 6809 |
| PAC | CONN | Conner Creek | 15 | 21 |
| PAC | COOS | Coos Bay | 1099 | 1554 |
| PAC | COPA | Copalis River | 60 | 85 |
| PAC | COQU | Coquille River | 282 | 399 |
| PAC | CUMM | Cummins Creek | 15 | 21 |
| PAC | CUTC | Cut Creek | 15 | 21 |
| PAC | DRAK | Drakes Estero | 2871 | 4060 |
| PAC | DRAY | Drayton Harbor | 1627 | 2301 |
| PAC | DUCK | Duck Creek | 15 | 21 |
| PAC | ECOL | Ecola Creek | 15 | 21 |
| PAC | EELR | Eel River | 375 | 530 |
| PAC | ELKC | Elk Creek | 62 | 87 |
| PAC | ELLY | Ellysly Creek | 15 | 21 |
| PAC | ELR2 | Elk River | 15 | 21 |
| PAC | ELR3 | Elk River | 108 | 153 |
| PAC | GRAY | Grays Harbor | 4340 | 6138 |
| PAC | GUAL | Gualala River | 135 | 191 |
| PAC | HARE | Hare Creek | 15 | 21 |
| PAC | HOHR | Hoh River | 81 | 114 |
| PAC | HUMB | Humbolt Bay | 3113 | 4403 |
| PAC | JALA | Jalama Creek | 15 | 21 |
| PAC | JOEC | Joe Creek | 15 | 21 |
| PAC | JOHS | Johnson Creek | 15 | 21 |
| PAC | JUAN | Strait of Juan de Fuca | 9815 | 13880 |
| PAC | KALA | Kalalock Creek | 15 | 21 |
| PAC | KLAM | Klamath River | 337 | 477 |
| PAC | LRIV | Little River | 181 | 255 |
| PAC | LSUR | Little Sur River | 15 | 21 |
| PAC | LUNA | Lunada Bay | 225 | 318 |
| PAC | MAGU | Mugu Lagoon | 351 | 497 |
| PAC | MAKA | Makah Bay | 1107 | 1565 |
| PAC | MALP | Malpaso Creek | 15 | 21 |
| PAC | MATT | Mattole River | 85 | 120 |
| PAC | MISN | Mission Bay Lagoon | 597 | 845 |
| PAC | MOCL | Moclips River | 15 | 21 |
| PAC | MONT | Monterey Bay | 10504 | 14855 |
| PAC | MORR | Morro Bay | 962 | 1360 |
| PAC | NAVA | Navarro River | 95 | 134 |
| PAC | NECA | Necanicum River Estuary | 221 | 313 |
| PAC | NEHA | Nehalem Bay | 777 | 1099 |
| PAC | NESK | Neskowin Creek | 15 | 21 |
| PAC | NEST | Nestucca Bay | 582 | 824 |
| PAC | NETA | Netarts Bay | 1139 | 1611 |
| PAC | NEWP | Newport Harbor | 420 | 594 |
| PAC | NOYO | Noyo River | 101 | 142 |
| PAC | OCEA | Oceanside Harbor | 138 | 196 |
| PAC | OLDC | Old Creek | 15 | 21 |
| PAC | OZET | Ozette River | 15 | 21 |
| PAC | PADI | Padilla Bay | 3052 | 4316 |
| PAC | PESC | Pescadero Creek | 15 | 21 |
| PAC | PHUE | Port Hueneme | 215 | 304 |
| PAC | PILA | Pilarcitos Creek | 15 | 21 |
| PAC | PUGE | Puget Sound | 15234 | 21545 |
| PAC | QUEE | Queets River | 150 | 212 |
| PAC | QUIL | Quillayute River | 150 | 212 |
| PAC | QUIN | Quinault River | 148 | 209 |
| PAC | RAFT | Raft River | 168 | 237 |
| PAC | RINC | Rincon Creek | 54 | 76 |
| PAC | ROCK | Rock Creek | 15 | 21 |
| PAC | ROGU | Rogue River | 270 | 382 |
| PAC | RUSS | Russian River | 165 | 233 |
| PAC | SALM | Salmon River Estuary | 180 | 255 |
| PAC | SAMI | Samish Bay | 3825 | 5410 |
| PAC | SAND | Sand Lake Estuary | 389 | 551 |
| PAC | SANR | Santa Ana River | 121 | 171 |
| PAC | SANS | San Simeon Creek | 15 | 21 |
| PAC | SANT | San Antonio Creek | 15 | 21 |
| PAC | SCLA | Santa Clara River | 195 | 276 |
| PAC | SDIE | San Diego Bay | 1829 | 2587 |
| PAC | SDIR | San Dieguito River | 75 | 106 |
| PAC | SELI | San Elijo Lagoon | 418 | 591 |
| PAC | SFRA | San Francisco Bay | 9376 | 13260 |
| PAC | SILE | Siletz Bay | 647 | 915 |
| PAC | SILT | Siltcoos River | 90 | 127 |
| PAC | SIXE | Sixes River | 90 | 127 |
| PAC | SLUI | San Luis Obispo Bay | 1337 | 1891 |
| PAC | SMAR | Santa Maria River | 15 | 21 |
| PAC | SMAT | San Mateo Creek | 15 | 21 |
| PAC | SMIT | Smith River | 251 | 356 |
| PAC | SMON | Santa Monica Bay | 233 | 330 |
| PAC | SMRR | Santa Margarita River | 342 | 484 |
| PAC | SPED | San Pedro Bay | 2097 | 2966 |
| PAC | SQUA | Squaw Creek | 15 | 21 |
| PAC | STEA | Steamboat Creek | 15 | 21 |
| PAC | STYN | Santa Ynez River | 120 | 170 |
| PAC | SUIS | Suislaw River | 429 | 607 |
| PAC | SUTT | Sutton Creek | 15 | 21 |
| PAC | TAHK | Tahkenitch Creek | 15 | 21 |
| PAC | TAJI | Tajiguas Creek | 15 | 21 |
| PAC | TEN1 | Tenmile Creek 1 | 15 | 21 |
| PAC | TEN2 | Tenmile Creek 2 | 15 | 21 |
| PAC | TENM | Ten Mile River | 95 | 134 |
| PAC | THRE | Threemile Creek | 15 | 21 |
| PAC | TIJU | Tijuana River | 15 | 21 |
| PAC | TILL | Tillamook Bay | 2414 | 3414 |
| PAC | TOMA | Tomales Bay | 1208 | 1708 |
| PAC | TUNI | Tunitas Creek | 15 | 21 |
| PAC | TWO2 | Twomile Creek 2 | 15 | 21 |
| PAC | TWOM | Twomile Creek 1 | 15 | 21 |
| PAC | UMPQ | Umpqua River | 1157 | 1636 |
| PAC | VENT | Ventura Harbor | 213 | 301 |
| PAC | WADD | Waddell Creek | 15 | 21 |
| PAC | WHIS | Whisky Run | 15 | 21 |
| PAC | WILL | Willapa Bay | 5296 | 7489 |
| PAC | WILS | Wilson Creek | 15 | 21 |
| PAC | WREC | Wreck Creek | 15 | 21 |
| PAC | YACH | Yachats River | 15 | 21 |
| PAC | YAQU | Yaquina Bay | 1001 | 1415 |

| **Coast** | **Estuary Code** | **Estuary name** | **Sub-estuary code** | **Sub-estuary name** | **Shore distance (m)** | **Max window (m)** |
| --- | --- | --- | --- | --- | --- | --- |
| ATL | ALBE | Albemarle Sound | ALLI | Alligator River | 3572 | 5052 |
| ATL | ALBE | Albemarle Sound | BUL2 | Bull Bay/Scuppernong River | 2280 | 3224 |
| ATL | ALBE | Albemarle Sound | CASH | Cashie River | 365 | 516 |
| ATL | ALBE | Albemarle Sound | CHOW | Chowan River | 2040 | 2885 |
| ATL | ALBE | Albemarle Sound | EDEN | Edenton Bay | 1170 | 1655 |
| ATL | ALBE | Albemarle Sound | LIT2 | Little River | 1182 | 1671 |
| ATL | ALBE | Albemarle Sound | NORT | North River | 2039 | 2883 |
| ATL | ALBE | Albemarle Sound | PASQ | Pasquotank River | 2387 | 3375 |
| ATL | ALBE | Albemarle Sound | PERQ | Perquimman's River | 1476 | 2088 |
| ATL | ALBE | Albemarle Sound | YEOP | Yeopim River | 525 | 742 |
| ATL | BARN | Barnegat Bay | LEGG | Little Egg Harbor | 1895 | 2680 |
| ATL | BARN | Barnegat Bay | TOMS | Tom's River | 767 | 1084 |
| ATL | BOGU | Bogue Sound/Core Sound | NWP2 | Newport River | 1337 | 1890 |
| ATL | BOGU | Bogue Sound/Core Sound | WOAK | White Oak River | 930 | 1315 |
| ATL | BUZZ | Buzzards Bay | NBED | New Bedford Harbor | 481 | 680 |
| ATL | BUZZ | Buzzards Bay | SLOC | Slocum River | 1015 | 1436 |
| ATL | BUZZ | Buzzards Bay | WPOR | Westport River | 532 | 752 |
| ATL | CHOP | Choptank River | LCHO | Little Choptank River | 2483 | 3511 |
| ATL | CHOP | Choptank River | MCHO | Mainstem Choptank River | 1786 | 2526 |
| ATL | JAME | James River | ELIZ | Elizabeth River | 870 | 1230 |
| ATL | JAME | James River | NANS | Nansemond River | 1337 | 1890 |
| ATL | LONG | Long Island Sound | CONN | Connecticut River | 684 | 967 |
| ATL | LONG | Long Island Sound | HOUS | Housatonic River | 283 | 400 |
| ATL | LONG | Long Island Sound | HUNT | Huntington Bay/Northport Bay | 1053 | 1490 |
| ATL | LONG | Long Island Sound | OYST | Oyster Bay | 1020 | 1443 |
| ATL | LONG | Long Island Sound | QINN | Quinnipiac River | 1773 | 2507 |
| ATL | LONG | Long Island Sound | THAM | Thames River | 684 | 967 |
| ATL | NARR | Narragansett Bay | GREE | Greenwich Bay | 1154 | 1632 |
| ATL | NARR | Narragansett Bay | MHOP | Mt. Hope Bay | 1976 | 2794 |
| ATL | NARR | Narragansett Bay | SAKO | Sakonnet River | 1867 | 2640 |
| ATL | NARR | Narragansett Bay | TAUN | Taunton River | 693 | 979 |
| ATL | OSSA | Ossabaw Sound | LOGE | Little Ogeechee River | 604 | 854 |
| ATL | OSSA | Ossabaw Sound | OGEE | Ogeechee River | 582 | 824 |
| ATL | PAML | Pamlico Sound | CROA | Croatan Sound | 3589 | 5075 |
| ATL | PAML | Pamlico Sound | JONE | Jones Bay - Bay River | 1560 | 2206 |
| ATL | PAML | Pamlico Sound | NEUS | Neuse River | 5367 | 7590 |
| ATL | PAML | Pamlico Sound | PALR | Tar-Pamlico River | 3816 | 5397 |
| ATL | PAML | Pamlico Sound | PUNG | Pungo River | 2173 | 3074 |
| ATL | SRCP | Southern Coastal Ponds | POIN | Point Judith Pond | 458 | 648 |
| ATL | STCA | Saint Catherines Sound | MEDW | Medway River | 524 | 741 |
| ATL | TANG | Tangier & Pocomoke Sounds | BIGA | Big Annimessex River | 1620 | 2291 |
| ATL | TANG | Tangier & Pocomoke Sounds | MANO | Manokin River | 2483 | 3511 |
| ATL | TANG | Tangier & Pocomoke Sounds | NATI | Nanticoke River | 1521 | 2151 |
| ATL | TANG | Tangier & Pocomoke Sounds | POCO | Pocomoke River | 6120 | 8655 |
| ATL | TANG | Tangier & Pocomoke Sounds | WICO | Wicomico River/Monie Bay | 1632 | 2308 |
| GOM | APCE | Apalachee Bay | OCHL | Ochlockonee River | 1294 | 1830 |
| GOM | ARAN | Aransas Bay | COPA | Copano Bay | 4642 | 6565 |
| GOM | ATCH | Atchafalaya Bay/Vermillion Bay | ATCB | Atchafalaya Bay | 6754 | 9552 |
| GOM | ATCH | Atchafalaya Bay/Vermillion Bay | ECOT | East Cote Blanche Bay | 6699 | 9474 |
| GOM | ATCH | Atchafalaya Bay/Vermillion Bay | VERM | Vermillion Bay | 9689 | 13702 |
| GOM | ATCH | Atchafalaya Bay/Vermillion Bay | WCOT | West Cote Blanche Bay | 8593 | 12152 |
| GOM | CHAH | Charlotte Harbor | CALO | Caloosahatchee River | 1443 | 2040 |
| GOM | CHAH | Charlotte Harbor | DEER | Deerfly Bay | 774 | 1095 |
| GOM | CHAH | Charlotte Harbor | GASA | Gasparilla Sound/Lemon Bay | 1383 | 1956 |
| GOM | CHAH | Charlotte Harbor | PINE | Pine Island Sound | 3681 | 5206 |
| GOM | CHAH | Charlotte Harbor | PUNT | Punta Gorda | 1591 | 2250 |
| GOM | MSND | Mississippi Sound | BILO | Biloxi Bay | 1764 | 2495 |
| GOM | MSND | Mississippi Sound | PACA | Pacagoula Bay | 1032 | 1460 |
| GOM | MSND | Mississippi Sound | STLB | Saint Louis Bay | 2197 | 3108 |
| GOM | TAMP | Tampa Bay | HILB | Hillsborough Bay | 2623 | 3709 |
| GOM | TAMP | Tampa Bay | OLDT | Old Tampa Bay | 3278 | 4636 |
| GOM | TAMP | Tampa Bay | TERR | Terra Ceia Bay/Miguel Bay | 828 | 1170 |
| GOM | TERR | Terrebonne Bay/Timbalier Bay | LANB | Landry Bay | 404 | 571 |
| GOM | TERR | Terrebonne Bay/Timbalier Bay | TERE | Terrebonne Bay | 5242 | 7414 |
| GOM | TERR | Terrebonne Bay/Timbalier Bay | TIMB | Timbalier Bay | 3661 | 5177 |
| PAC | COLU | Columbia River | YOUN | Young's Bay | 1332 | 1884 |
| PAC | JUAN | Strait of Juan de Fuca | CLAL | Clallum Bay | 757 | 1071 |
| PAC | JUAN | Strait of Juan de Fuca | CRES | Crescent Bay | 474 | 671 |
| PAC | JUAN | Strait of Juan de Fuca | PORT | Port Angeles | 1332 | 1883 |
| PAC | PUGE | Puget Sound | ADMI | Admiralty Inlet | 4460 | 6307 |
| PAC | PUGE | Puget Sound | DABO | Dabob Bay | 2613 | 3695 |
| PAC | PUGE | Puget Sound | DISC | Discovery Bay | 1710 | 2419 |
| PAC | PUGE | Puget Sound | DUNG | Dungeness Bay | 1332 | 1883 |
| PAC | PUGE | Puget Sound | HOOD | Hood Canal | 2550 | 3606 |
| PAC | PUGE | Puget Sound | SEQU | Sequim Bay | 1260 | 1782 |
| PAC | PUGE | Puget Sound | SKAG | Skagit Bay/Posession Sound | 4325 | 6117 |
| PAC | PUGE | Puget Sound | SPUG | South Puget Sound | 4715 | 6669 |
| PAC | SFRA | San Francisco Bay | CENT | Central Bay | 7623 | 10780 |
| PAC | SFRA | San Francisco Bay | SOU2 | South Bay | 6585 | 9312 |
| PAC | SFRA | San Francisco Bay | SPAB | San Pablo Bay | 8608 | 12174 |
| PAC | SFRA | San Francisco Bay | SUIS | Suisin Bay | 2881 | 4075 |
| PAC | SPED | San Pedro Bay | ALAM | Alamitos Bay | 295 | 418 |
| PAC | SPED | San Pedro Bay | ANAH | Anaheim Bay | 228 | 323 |
| PAC | SPED | San Pedro Bay | LAHR | Los Angelos Harbor Region | 1543 | 2182 |
